# Supplementary material for: Efficacy and Safety Assessment of the Addition of Bevacizumab to Adjuvant Therapy Agents in Cancer Patients: A Systematic Review and Meta-Analysis of Randomized Controlled Trials
Source: PubMed Central journal article supplement (PMC4558033; doi:10.1371/journal.pone.0136324), 2015-09-02
Supplement: pone.0136324.s005.pdf [file pone.0136324.s005.pdf]

**S1 Table: Search strategy**

| Design                      |     | Determinant (s) |     | Outcome (s)           |    |               |
|-----------------------------|-----|-----------------|-----|-----------------------|----|---------------|
| Randomized controlled trial | AND | Bevacizumab     | AND | Safety                | OR | Efficacy      |
| Randomized clinical trial   | AND | Avastin         | AND | Toxicity              | OR | Benefit       |
| Randomized trial            | AND |                 |     | Adverse drug reaction | OR | Effectiveness |
|                             |     |                 |     | Adverse drug effect   | OR |               |
|                             |     |                 |     | Adverse drug event    | OR |               |
|                             |     |                 |     | Side effect           | OR |               |
|                             |     |                 |     | Risk                  | OR |               |
