# Supplementary material for: Efficacy and Safety Assessment of the Addition of Bevacizumab to Adjuvant Therapy Agents in Cancer Patients: A Systematic Review and Meta-Analysis of Randomized Controlled Trials
Source: PubMed Central journal article supplement (PMC4558033; doi:10.1371/journal.pone.0136324), 2015-09-02

**S3 Table:** Risk of bias assessment in all included trials

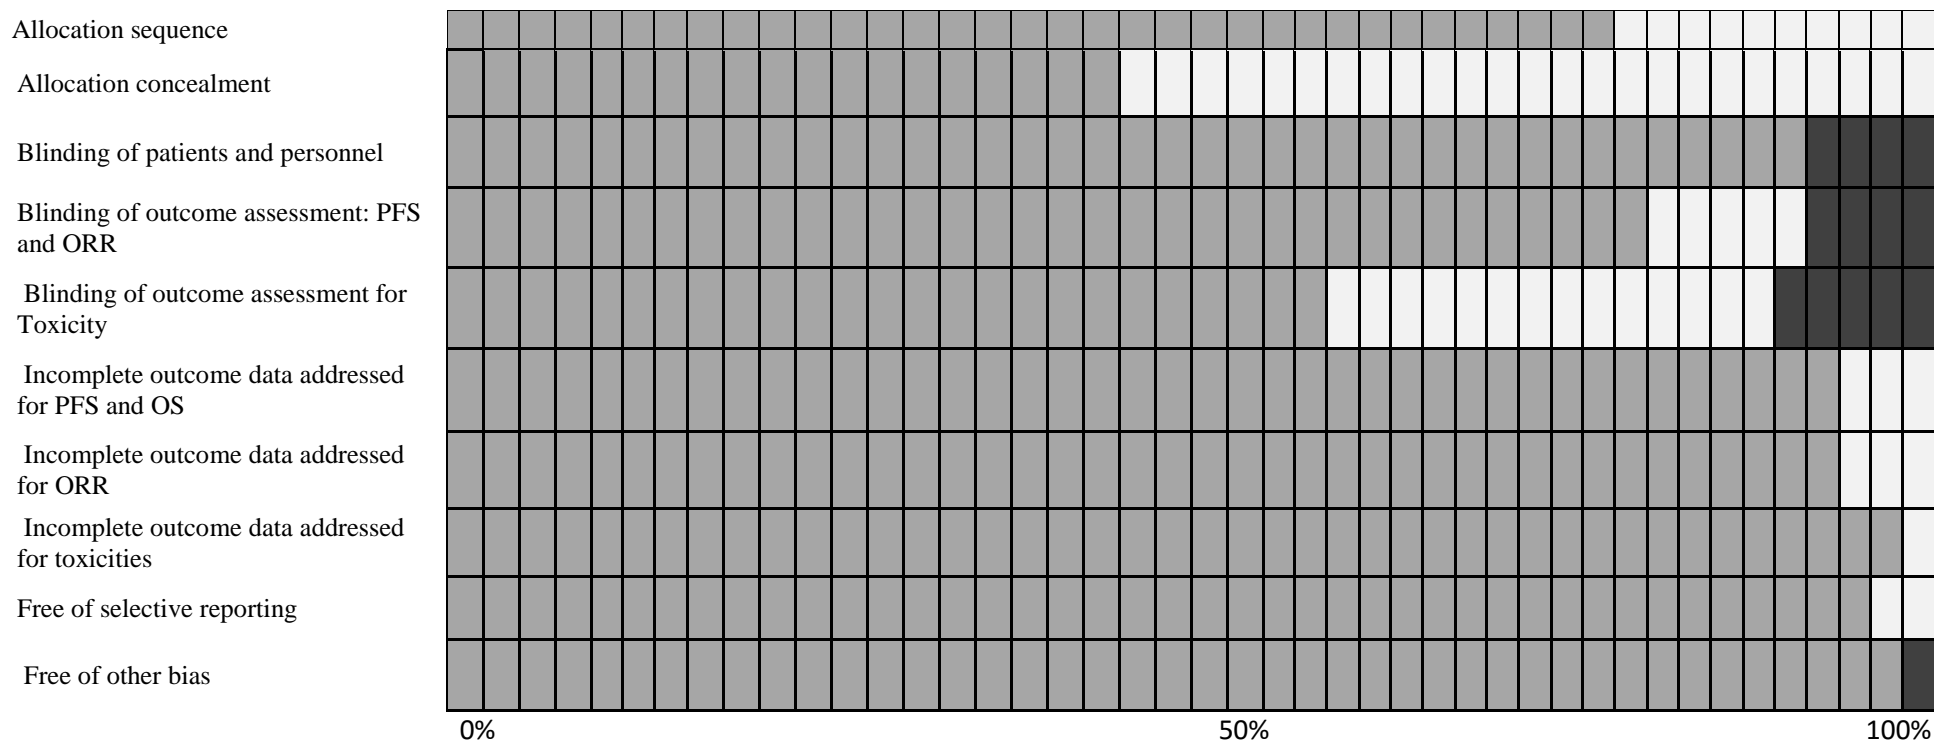

**Abbreviation:** PFS, progression free survival; OS, overall survival; ORR, overall response rate

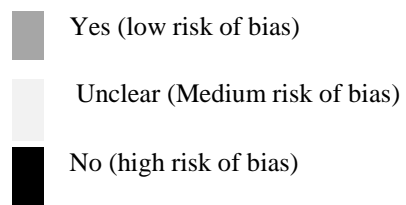

Supplement: pone.0136324.s006.pdf [file pone.0136324.s006.pdf]
